# Supplementary material
Source: Springer Nature journal article supplement (https://www.springermedizin.de/resource/supplementary/12883_2010_459_MOESM1_ESM.pdf/9455510)

Figure 1

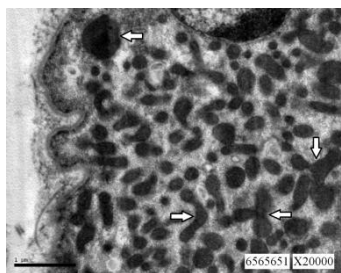

a

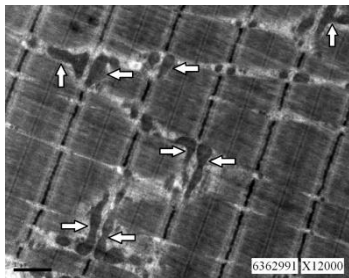

b

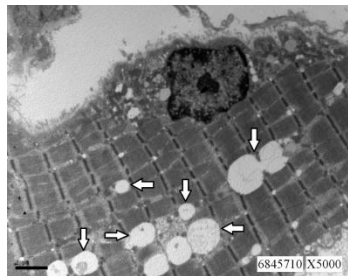

c

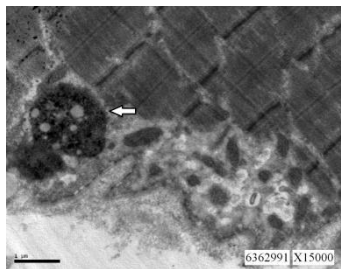

d

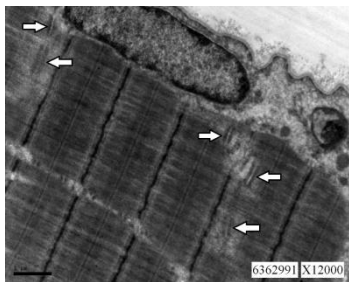

e

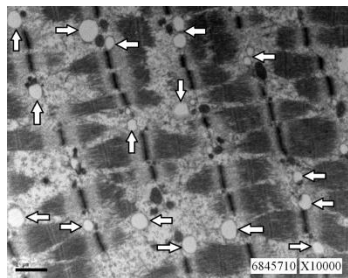

f

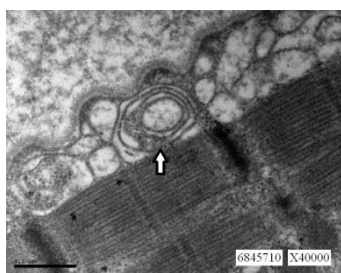

g

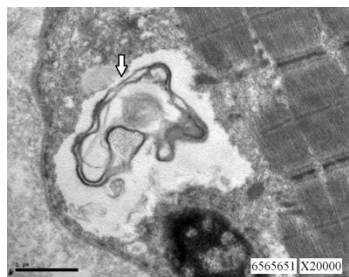

h

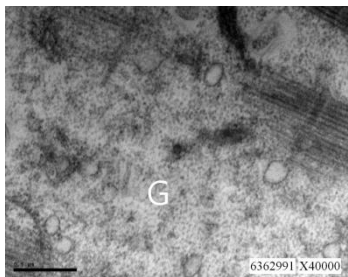

i

Supplement: MOESM1 [file 9455510]
